# Supplementary material for: Detecting Concerted Demographic Response across Community Assemblages Using Hierarchical Approximate Bayesian Computation
Source: PubMed Central journal article supplement — Mol Biol Evol. 2014 Jun 12;31(9):2501–15. doi: 10.1093/molbev/msu187 (PMC4137712; doi:10.1093/molbev/msu187), 2014-06-12

Supplemental Material Figures 1A-Q) Histograms of summary statistics for  $\zeta = 1.0$  and Supplemental Material Figure 2A-Q). Histograms of summary statistics for  $\zeta = 0.0$ . Comparisons between summary statistics for congruent ( $\zeta = 1.0$ ) and random ( $\zeta = 0.0$ ) expansion show they have different distributions under the two models.

Supplemental Figure 1

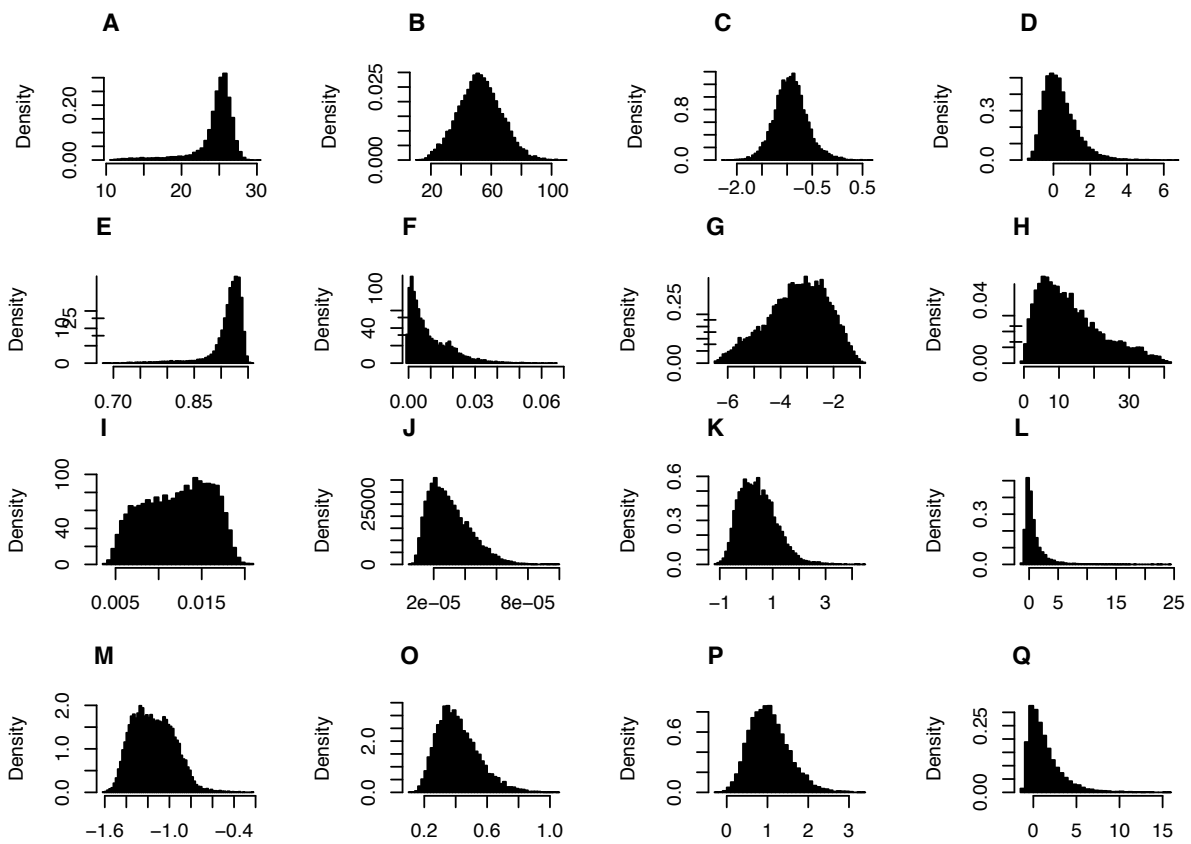

Supplemental Figure 2

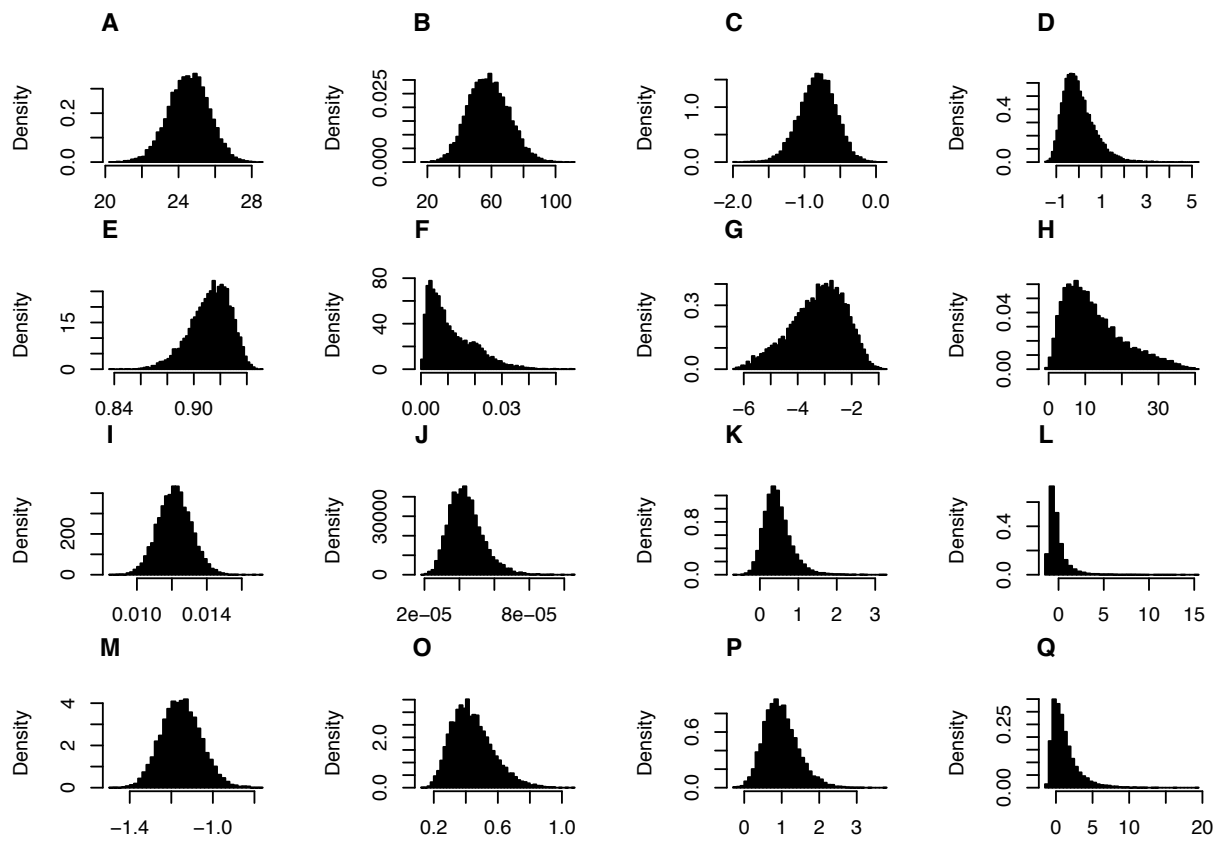

Supplement: supp_msu187_Supplemental.pdf [file supp_msu187_Supplemental.pdf]
